# Supplementary material for: Carbazole-functionalized hyper-cross-linked polymers for CO 2 uptake based on Friedel–Crafts polymerization on 9-phenylcarbazole
Source: publisher site journal article supplement (doi:10.3762/bjoc.15.279), 2019-11-26
Supplement: Additional file 1 [file 1860-5397-15-279-S1.pdf]

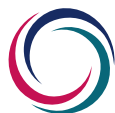

## Supporting Information

for

### **Carbazole-functionalized hyper-cross-linked polymers for CO<sub>2</sub> uptake based on Friedel–Crafts polymerization on 9-phenylcarbazole**

Dandan Fang, Xiaodong Li, Meishuai Zou, Xiaoyan Guo and Aijuan Zhang

*Beilstein J. Org. Chem.* **2019**, *15*, 2856–2863. [doi:10.3762/bjoc.15.279](https://doi.org/10.3762/bjoc.15.279)

## Additional experimental results

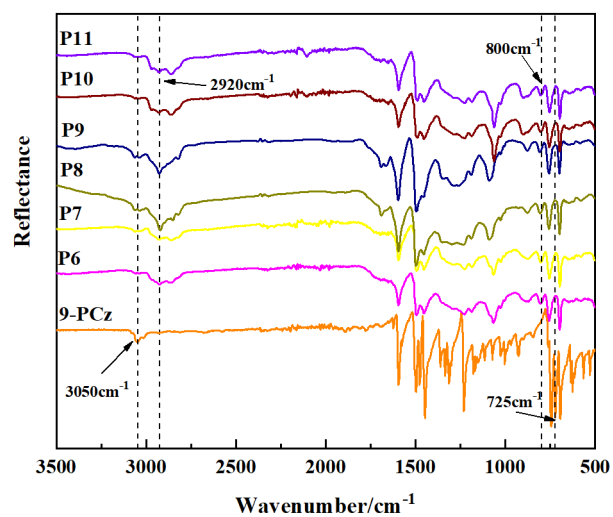

**Figure S1:** FTIR spectrum of HCPs **P6–P11** and 9-PCz.

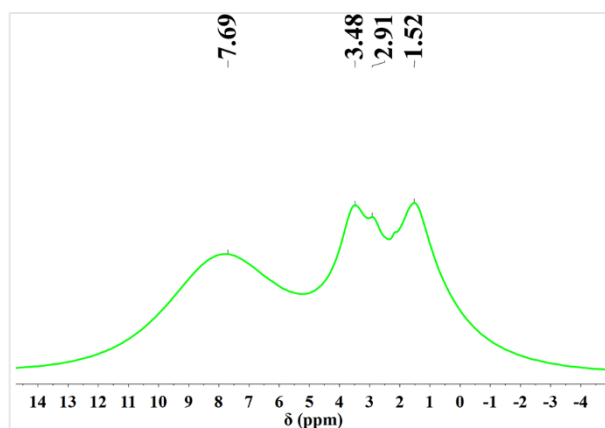

**Figure S2:** Solid <sup>1</sup>H NMR spectrum of **P3**.

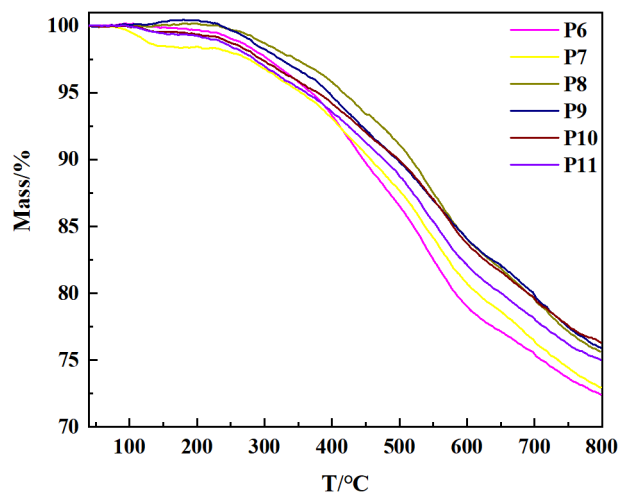

**Figure S3:** TGA curves of HCPs **P6–P11**.

**Table S1:** The thermal stability of HCPs.

| HCPs | Decomposition temperature <sup>a</sup> /°C | Mass residues/% |
|------|--------------------------------------------|-----------------|
| P1   | 594                                        | 80              |
| P2   | 301                                        | 74              |
| P3   | 364                                        | 74              |
| P4   | 274                                        | 69              |
| P5   | 273                                        | 68              |
| P6   | 370                                        | 72              |
| P7   | 354                                        | 73              |
| P8   | 417                                        | 75              |
| P9   | 396                                        | 76              |
| P10  | 380                                        | 76              |
| P11  | 362                                        | 75              |

<sup>a</sup>Decomposition temperature is the 5 wt % weight loss temperature for HCPs.

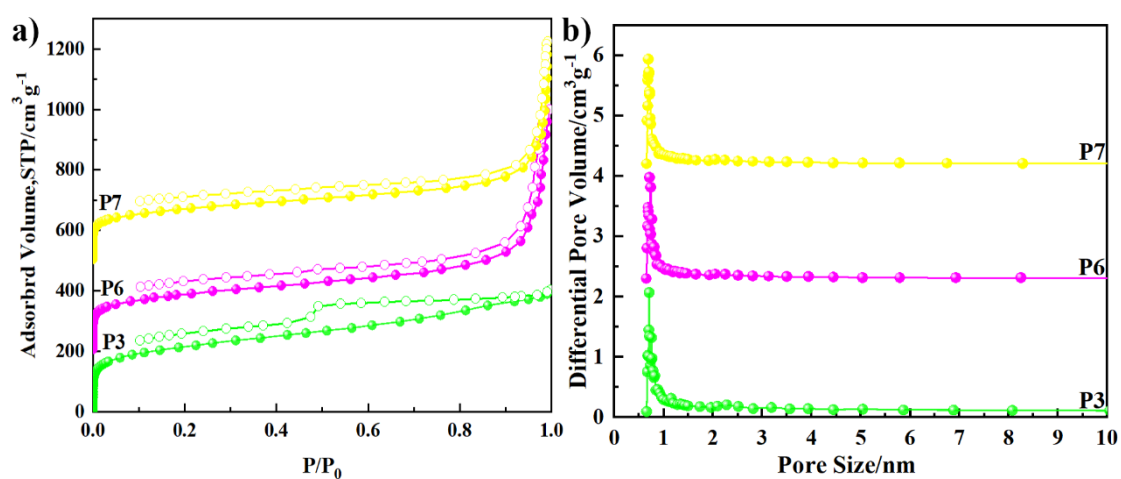

**Figure S4:** Nitrogen sorption isotherms (a) and pore size distribution (b) of P3, P6, P7.

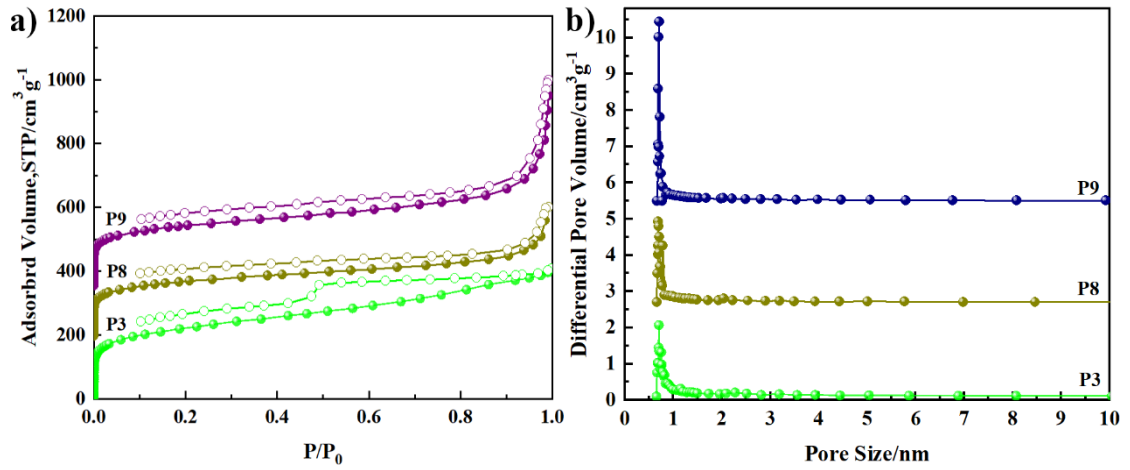

**Figure S5:** Nitrogen sorption isotherms (a) and pore size distribution (b) of **P3, P8, P9**.

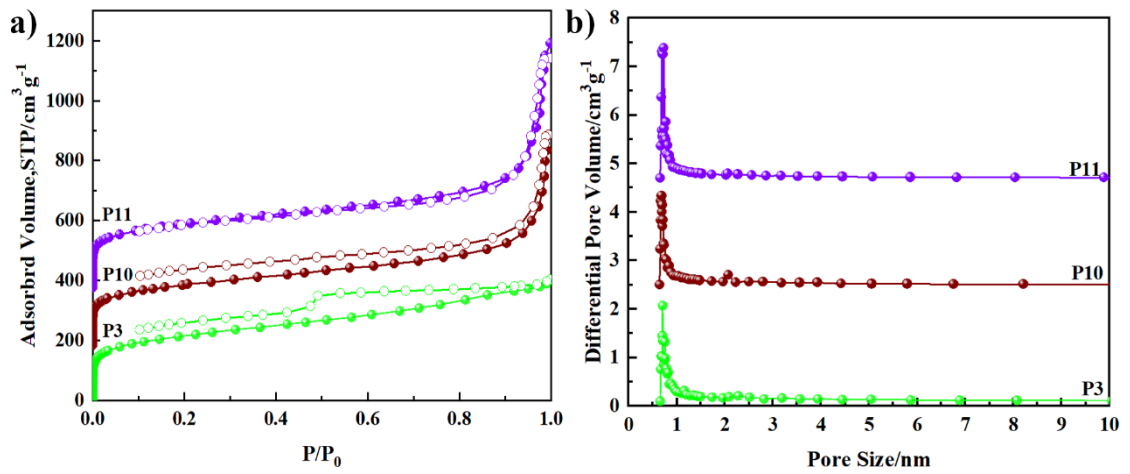

**Figure S6:** Nitrogen sorption isotherms (a) and pore size distribution (b) of **P3, P10, P11**.

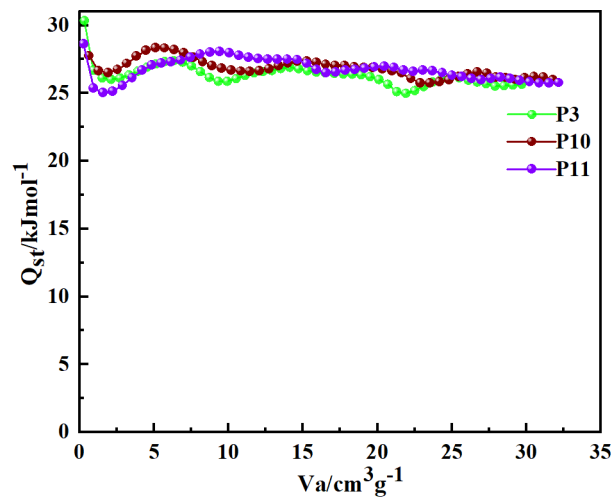

**Figure S7:** the isothermic heat curves of **P3, P10, P11**.
